# Supplementary material
Source: PubMed Central journal article supplement (PMC2995614)
Supplement: supp_123_24_4292__1.pdf [file supp_123_24_4292__1.pdf]

Table S1. siRNA sequences used in this study

| Target gene | siRNA start position | Region | siRNA sequence            |
|-------------|----------------------|--------|---------------------------|
| Aurora B    | 249                  | ORF    | CCUCUGCAUCUCUUGCCUUTT     |
| Aurora B    | 479                  | ORF    | GCCAGAAGUUGGCUGAGAATT     |
| Aurora B    | 1247                 | ORF    | CCAAGCUGCUCAAACAUAAATT    |
| Aurora B    | 1621                 | 3'UTR  | CCAGGAACCUAGAACUCAATT     |
| Aurora B    | 1726                 | 3'UTR  | GCAUGGAUGUGGUUAUCAUTT     |
| Aurora B    | 1878                 | 3'UTR  | AUAGCCUAGUCUGUCUUAATT     |
| Aurora C    | 87                   | 5'UTR  | GCCAAAGCGCAAUCUGGAA       |
| Aurora C    | 239                  | 5'UTR  | GCAACUAGCAGGACUUCAA       |
| Aurora C    | 1154                 | ORF    | GGGUGCUUCCUUGCUAGUU       |
| Aurora C    | 94                   | 5'UTR  | CGCAAUCUGGAAACCUCUUGAGUG  |
| Aurora C    | 359                  | ORF    | CCAGGAAGCAUUUCACCAUTT     |
| Aurora C    | 1278                 | 3'UTR  | UGAAGUGAUGUUAUUAAAAC      |
| INCENP      | 664                  | ORF    | CAAAGGUAGCCUCCUCCAUCUCCA  |
| INCENP      | 713                  | ORF    | GAGGAGGAACUAACACCCAAGAAAU |
| INCENP      | 818                  | ORF    | GAAGGACGUUCUGUUUCCAAGCUCA |
| INCENP      | 2979                 | 3'UTR  | CUAUCAGUGUCCUCUGUUUTT     |
| INCENP      | 3077                 | 3'UTR  | GCAGUACUCUGUAAAUAATT      |

Silencer Select Negative Control #1 siRNA, catalogue number 4390844 (Ambion/Applied Biosystems). Silencer Select GAPDH siRNA (Hs, Mm, Rn), catalogue number 4390849 (Ambion/Applied Biosystems).
