# Supplementary material
Source: PubMed Central journal article supplement (PMC2995614)
Supplement: supp_123_24_4292__2.pdf [file supp_123_24_4292__2.pdf]

Table S2. Effects of exogenous Aurora kinases B and C on polar body extrusion (PBE)\*

| Group                  | Total analysed | No PBE/MI (%) | PBE/MII (%) |
|------------------------|----------------|---------------|-------------|
| Control<br>Securin-GFP | 97             | 16 (16)       | 81 (84)     |
| Aurora C mRNA          | 104            | 44 (42)       | 60 (58)     |
| Aurora B mRNA          | 134            | 75 (56)       | 59 (44)     |

\*Aggregated data from two independent experiments.
